# Supplementary material
Source: Research Square preprint supplement (doi:10.21203/rs.3.rs-9629956/v1)
Supplement: Supplementary file 1 [file 1f73b4eada89d749cf3dcb34.pdf]

# Assessing ecological exposure from utility-scale wind and solar expansion: a global integrity-conditioned framework for environmental management

Journal: Environmental Management

Author: Magdalena Olczyk

Affiliation: Faculty of Management and Economics, Gdańsk University of Technology, Gdańsk, Poland

Corresponding author email: Magdalena.Olczyk@pg.edu.pl

## Online Resource 1

### S1. Data Sources and Versions

**Table S1.** Data sources and versions used in the analysis.

| Dataset                                  | Version / Release          | Spatial Resolution              | Format Used        | License / Access                             |
|------------------------------------------|----------------------------|---------------------------------|--------------------|----------------------------------------------|
| Global Renewables Watch (Solar & Wind)   | Q2 2024                    | Asset-level (polygons & points) | GeoPackage (.gpkg) | Open data (MIT-style distribution)           |
| Global Human Modification (gHM)          | Version 1 (2019)           | ~1 km raster                    | GeoTIFF (.tif)     | NASA SEDAC open access                       |
| Human Footprint                          | LWP-3 (2009, 2018 release) | ~1 km raster                    | GeoTIFF (.tif)     | NASA SEDAC open access                       |
| World Database on Protected Areas (WDPA) | 2024 release               | Polygon (global)                | Shapefile (.shp)   | Free for research; redistribution restricted |
| GADM Administrative Boundaries           | Version 4.1                | Polygon (multi-level)           | GeoPackage (.gpkg) | Academic use; redistribution restricted      |

*All datasets are publicly accessible from the original providers. Derived indicators and processing scripts necessary to reproduce the analysis will be made available upon publication.*

### S2. Scale–Siting Decomposition Tables (Fig. 2)

**Table S2.** Panel A – gHM baseline integrity

| Quadrant                    | n   | % obs  | $\Delta A$ (km <sup>2</sup> ) | % $\Delta A$ | $\Delta A \times I$ (km <sup>2</sup> ) | % $\Delta A \times I$ | $\Delta A \times (1-I)$ (km <sup>2</sup> ) | % $\Delta A \times (1-I)$ |
|-----------------------------|-----|--------|-------------------------------|--------------|----------------------------------------|-----------------------|--------------------------------------------|---------------------------|
| High-scale / High-integrity | 29  | 24.4%  | 33.508                        | 83.7%        | 26.776                                 | 93.4%                 | 6.732                                      | 59.1%                     |
| High-scale / Low-integrity  | 27  | 22.7%  | 5.290                         | 13.2%        | 1.324                                  | 4.62%                 | 3.966                                      | 34.8%                     |
| Low-scale / High-integrity  | 31  | 26.1%  | 0.578                         | 1.44%        | 0.391                                  | 1.36%                 | 0.187                                      | 1.65%                     |
| Low-scale / Low-integrity   | 32  | 26.9%  | 0.669                         | 1.67%        | 0.166                                  | 0.58%                 | 0.503                                      | 4.41%                     |
| Total                       | 119 | 100.0% | —                             | 100.0%       | —                                      | 100.0%                | —                                          | 100.0%                    |

**Table S3.** Panel B – Human Footprint baseline integrity

| Quadrant                    | n   | % obs  | $\Delta A$ (km <sup>2</sup> ) | % $\Delta A$ | $\Delta A \times I$ (km <sup>2</sup> ) | % $\Delta A \times I$ | $\Delta A \times (1-I)$ (km <sup>2</sup> ) | % $\Delta A \times (1-I)$ |
|-----------------------------|-----|--------|-------------------------------|--------------|----------------------------------------|-----------------------|--------------------------------------------|---------------------------|
| High-scale / High-integrity | 41  | 31.8%  | 35.784                        | 82.5%        | 32.153                                 | 87.8%                 | 3.630                                      | 53.7%                     |
| High-scale / Low-integrity  | 24  | 18.6%  | 6.314                         | 14.6%        | 3.588                                  | 9.80%                 | 2.726                                      | 40.3%                     |
| Low-scale / High-integrity  | 24  | 18.6%  | 0.518                         | 1.20%        | 0.458                                  | 1.25%                 | 0.061                                      | 0.90%                     |
| Low-scale / Low-integrity   | 40  | 31.0%  | 0.753                         | 1.74%        | 0.406                                  | 1.11%                 | 0.348                                      | 5.14%                     |
| Total                       | 129 | 100.0% | —                             | 100.0%       | —                                      | 100.0%                | —                                          | 100.0%                    |

### S3. Robustness Checks

Indicators are recomputed under alternative integrity layers (gHM vs Human Footprint) and nonlinear weighting exponents ( $\gamma = 2, 3$ ) for RIEPI, and under alternative upper-tail thresholds ( $q = 0.80, 0.95$ ) for RLHIPI. Table S4 summarizes ranking instability relative to the baseline specification.

Ranking instability is reported as  $|\Delta rank| = |rank_{alt} - rank_{base}|$  together with Spearman rank correlations. Rankings use 2017–2024 totals (descending order; 1 = highest exposure) and the “min” tie rule. RLHIPI robustness is evaluated on the subset of countries with non-zero RLHIPI under at least one threshold to avoid tie-driven rank noise. Additional pre-specified tests that require reprocessing of footprint geometries (wind buffer radii) or alternative quantile definitions (deployment-conditioned and global quantiles) follow the same workflow and can be regenerated from the spatial pipeline.

**Table S4.** Ranking robustness summary (country-level).

| Specification                                                             | N  | Median<br>  $\Delta rank$ | Mean<br>  $\Delta rank$ | Max<br>  $\Delta rank$ | Spearman<br>$\rho$ | %<br>reclassified |
|---------------------------------------------------------------------------|----|---------------------------|-------------------------|------------------------|--------------------|-------------------|
| <b>Panel A: RIEPI robustness (baseline: gHM, <math>\gamma = 1</math>)</b> |    |                           |                         |                        |                    |                   |
| HFP layer ( $\gamma=1$ )                                                  | 40 | 2                         | 2.0                     | 11                     | 0.97               | 82.5              |
| $\gamma=2$ (gHM)                                                          | 40 | 2                         | 2.3                     | 9                      | 0.96               | 85.0              |
| $\gamma=3$ (gHM)                                                          | 40 | 2                         | 4.0                     | 20                     | 0.86               | 75.0              |
| HFP, $\gamma=2$                                                           | 40 | 3                         | 4.2                     | 11                     | 0.89               | 90.0              |
| HFP, $\gamma=3$                                                           | 40 | 4                         | 6.0                     | 19                     | 0.75               | 92.5              |
| <b>Panel B: RLHIPI robustness (baseline: <math>q = 0.90</math>)</b>       |    |                           |                         |                        |                    |                   |
| $q=0.80$ (vs 0.90)                                                        | 10 | 0                         | 0                       | 0                      | 1.00               | 0.0               |
| $q=0.95$ (vs 0.90)                                                        | 10 | 1                         | 1.1                     | 2                      | 0.72               | 100.0             |

*RIEPI rankings remain highly correlated across moderate specification changes, while stronger non-linear weighting produces larger reordering. RLHIPI rankings are stable under modest threshold variation and shift primarily when the tail definition is tightened to the extreme tail ( $q = 0.95$ ).*

#### S4. Country hotspot summaries

**Table S5** reports the countries with the highest cumulative integrity-conditioned exposure under the baseline gHM specification for 2017–2024. Fig. S1 maps the same cumulative country-level surface and pairs it with a top-country ranking. For plotting only, country boundaries follow the Natural Earth low-resolution layer; the table retains the full analytic country list used in the indicator calculations.

**Table S5.** Top country exposure hotspots by cumulative RIEPI (gHM baseline, 2017–2024).

| Rank | Country      | Cum. $\Delta A$<br>( $km^2$ ) | Cum. RIEPI<br>( $km^2\text{-eq}$ ) | Footprint<br>rank | Shift | Peak RLHIPI<br>$q_{0.90}$ | Peak<br>year |
|------|--------------|-------------------------------|------------------------------------|-------------------|-------|---------------------------|--------------|
| 1    | Mexico       | 8.35                          | 3.75                               | 2                 | +1    | 1.00                      | 2018         |
| 2    | Chile        | 22.94                         | 2.20                               | 1                 | -1    | 0.36                      | 2022         |
| 3    | Israel       | 1.13                          | 0.88                               | 5                 | +2    | 0.00                      | —            |
| 4    | Japan        | 0.78                          | 0.70                               | 7                 | +3    | 0.00                      | —            |
| 5    | Turkmenistan | 0.81                          | 0.53                               | 6                 | +1    | 0.00                      | —            |
| 6    | Jamaica      | 0.44                          | 0.36                               | 9                 | +3    | 0.00                      | —            |
| 7    | Armenia      | 0.60                          | 0.20                               | 8                 | +1    | 0.00                      | —            |
| 8    | Cyprus       | 0.24                          | 0.19                               | 15                | +7    | 0.00                      | —            |
| 9    | Kuwait       | 0.36                          | 0.18                               | 11                | +2    | 0.00                      | —            |
| 10   | Russia       | 0.32                          | 0.18                               | 12                | +2    | 0.00                      | —            |

*Positive shift values indicate that a country moves upward in the exposure ranking when footprint growth is conditioned on baseline integrity.*

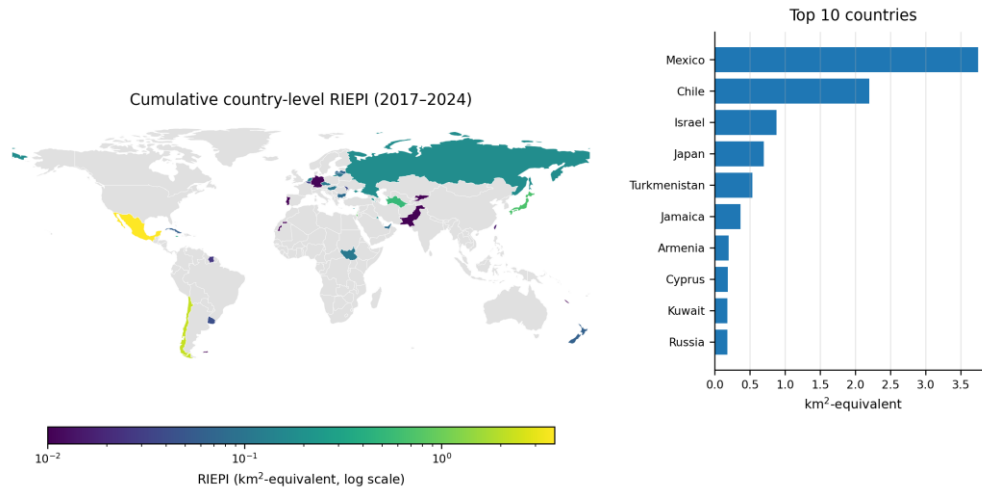

**Fig. S1.** Country hotspot map and top-country ranking for cumulative RIEPI (gHM baseline, 2017–2024). The map uses a logarithmic color scale to improve visibility outside the highest-exposure cases.

### S5. Regional hotspot summaries

**Table S6** reports the regional units with the highest cumulative RIEPI over 2017–2024. The regional ranking shows that aggregate country-level exposure is anchored in a small set of repeatedly observed subnational units rather than being evenly distributed across space.

**Table S6.** Top regional exposure hotspots by cumulative RIEPI (gHM baseline, 2017–2024).

| Rank | Region         | Country      | Cum. $\Delta A$ (km <sup>2</sup> ) | Cum. RIEPI (km <sup>2</sup> -eq) | Shift | Peak RLHIPI q0.90 | Peak year |
|------|----------------|--------------|------------------------------------|----------------------------------|-------|-------------------|-----------|
| 1    | Aguascalientes | Mexico       | 8.35                               | 3.75                             | +1    | 1.00              | 2018      |
| 2    | Antofagasta    | Chile        | 22.94                              | 2.20                             | -1    | 0.36              | 2022      |
| 3    | Golan          | Israel       | 1.13                               | 0.88                             | +2    | 0.00              | —         |
| 4    | Aichi          | Japan        | 0.78                               | 0.70                             | +4    | 0.00              | —         |
| 5    | Aşgabat        | Turkmenistan | 0.81                               | 0.53                             | +1    | 0.00              | —         |
| 6    | Ahal           | Turkmenistan | 0.81                               | 0.53                             | +1    | 0.00              | —         |
| 7    | Clarendon      | Jamaica      | 0.44                               | 0.36                             | +3    | 0.00              | —         |
| 8    | Aragatsotn     | Armenia      | 0.60                               | 0.20                             | +1    | 0.00              | —         |
| 9    | Famagusta      | Cyprus       | 0.24                               | 0.19                             | +7    | 0.00              | —         |
| 10   | Al Ahmadi      | Kuwait       | 0.36                               | 0.18                             | +2    | 0.00              | —         |

*Peak RLHIPI q0.90 reports the largest annual upper-tail exposure share observed for each region in the baseline tail specification.*

### S6. RLHIPI hotspot persistence across thresholds

**Fig. S2** plots every country-year observation with positive RLHIPI under at least one threshold ( $q = 0.80, 0.90, \text{ or } 0.95$ ). The plot highlights whether country-year tail hotspots persist or disappear as the tail definition is tightened. RLHIPI should therefore be interpreted as a concentration diagnostic for exposure in the highest-integrity fraction of landscapes, not as a direct estimate of realized biodiversity outcomes.

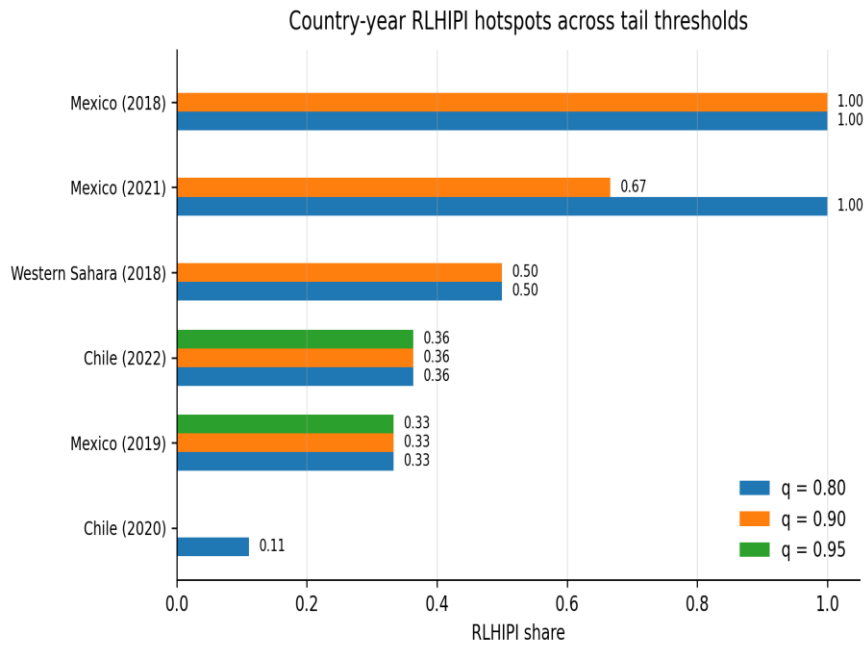

**Fig. S2.** Country-year RLHIPI hotspots across  $q = 0.80, 0.90,$  and  $0.95$ . Only observations with positive RLHIPI under at least one threshold are shown.
